# Supplementary material for: Separated Micelles Formation of pH-Responsive Random and Block Copolymers Containing Phosphorylcholine Groups
Source: MDPI journal article supplement (doi:10.3390/polym14030577), 2022-01-31
Supplement: s1 [file s1]

## Supporting information

### Separated Micelles Formation of pH-Responsive Random and Block Copolymers Containing Phosphorylcholine Groups

Thi Lien Nguyen<sup>1</sup>, Kazuhiko Ishihara<sup>2</sup> and Shin-ichi Yusa<sup>1,\*</sup>

<sup>1</sup> Department of Applied Chemistry, Graduate School of Engineering, University of Hyogo, 2167 Shosha, Himeji, Hyogo 671-2280, Japan; [nguyenlien56hh@gmail.com](mailto:nguyenlien56hh@gmail.com)

<sup>2</sup> Department of Materials Engineering, The University of Tokyo, 7-3-1 Hongo, Bunkyo-ku, Tokyo 113-8656, Japan; [ishihara@mpc.t.u-tokyo.ac.jp](mailto:ishihara@mpc.t.u-tokyo.ac.jp)

\* Correspondence: [yusa@eng.u-hyogo.ac.jp](mailto:yusa@eng.u-hyogo.ac.jp)

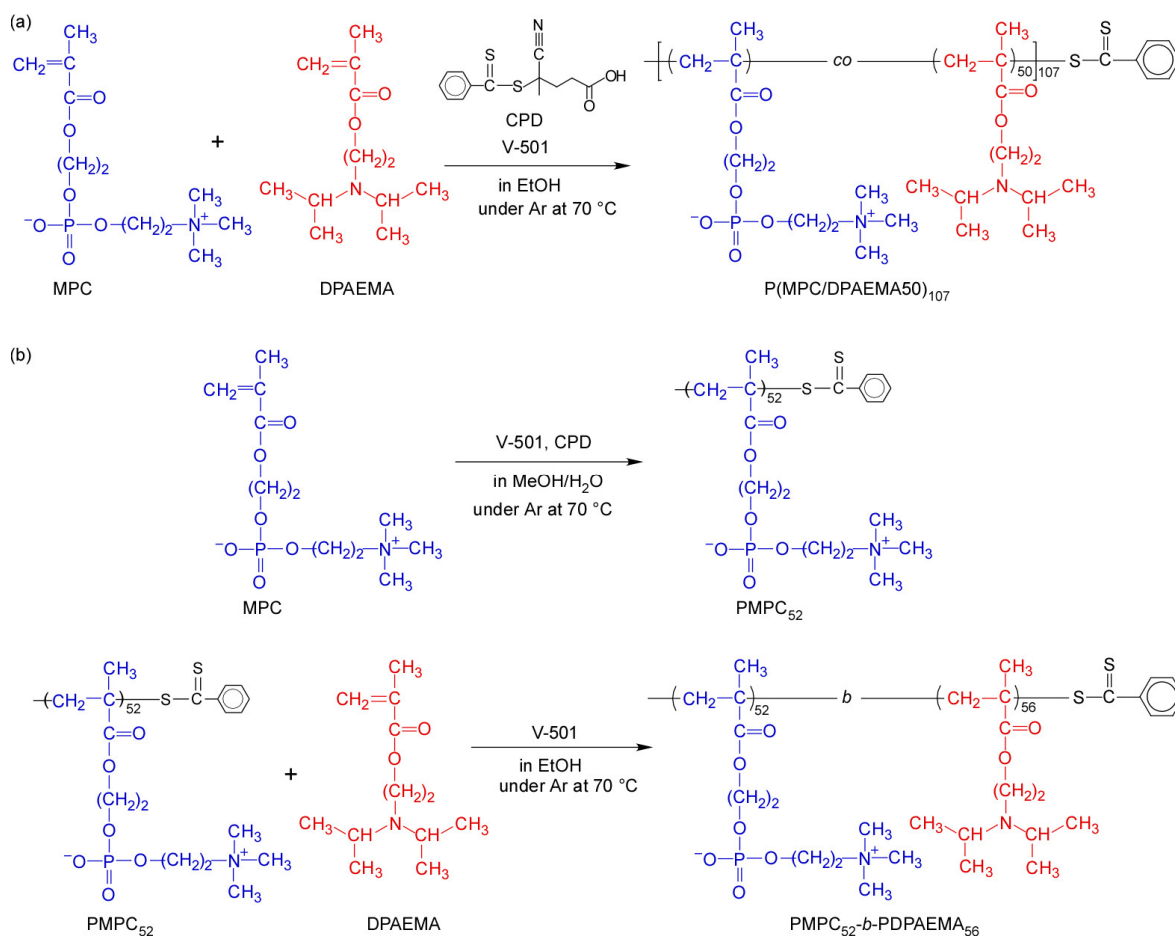

**Scheme S1.** Synthesis of (a) random copolymer P(MPC/DPAEMA50)<sub>107</sub> and (b) block copolymer PMPC<sub>52</sub>-*b*-PDPAEMA<sub>56</sub>.

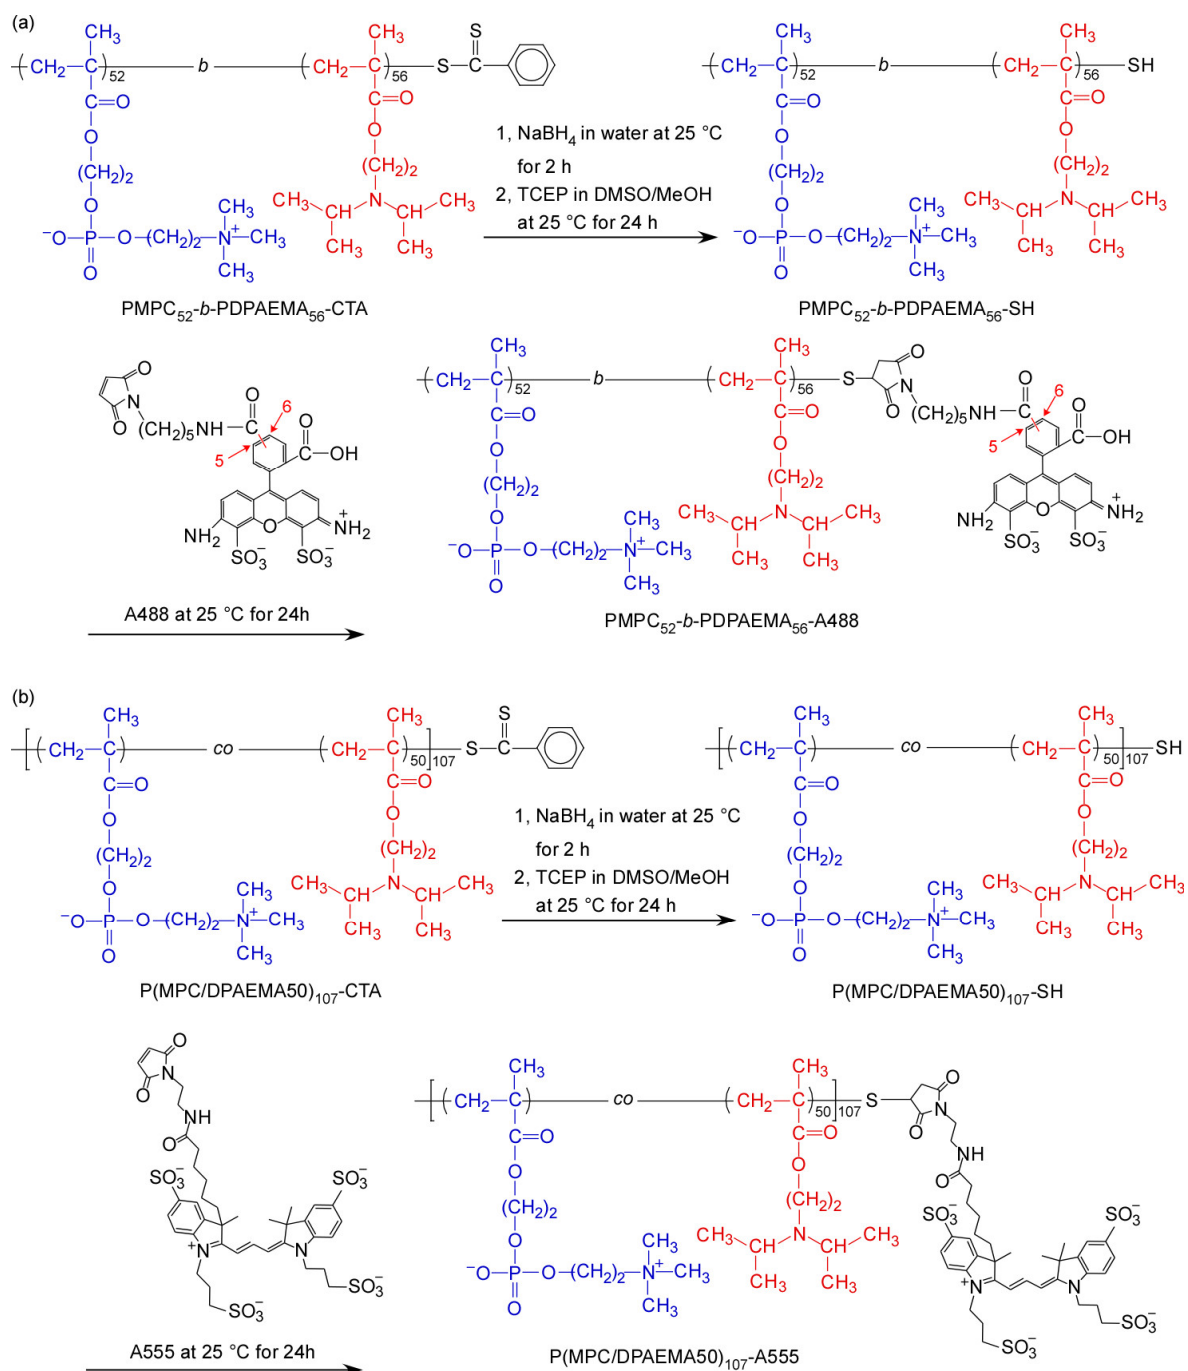

**Scheme S2.** Elimination of the RAFT end groups and labeling of (a) PMPC<sub>52</sub>-*b*-PDPAEMA<sub>56</sub> with Alexa Fluor 488 C<sub>5</sub> maleimide (A488) and (b) P(MPC/DPAEMA50)<sub>107</sub> with Alexa Fluor 555 C<sub>2</sub> maleimide (A555).

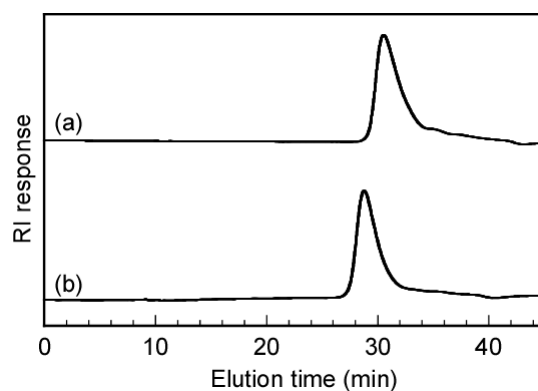

**Figure S1.** Gel-permeation chromatography (GPC) elution curves of (a)  $\text{P(MPC/DPAEMA50)}_{107}$  and (b)  $\text{PMPC}_{52}\text{-}b\text{-PDPAEMA}_{56}$  using a 0.3 M  $\text{Na}_2\text{SO}_4$  aqueous solution containing 0.5 M acetic acid as an eluent at 40°C.

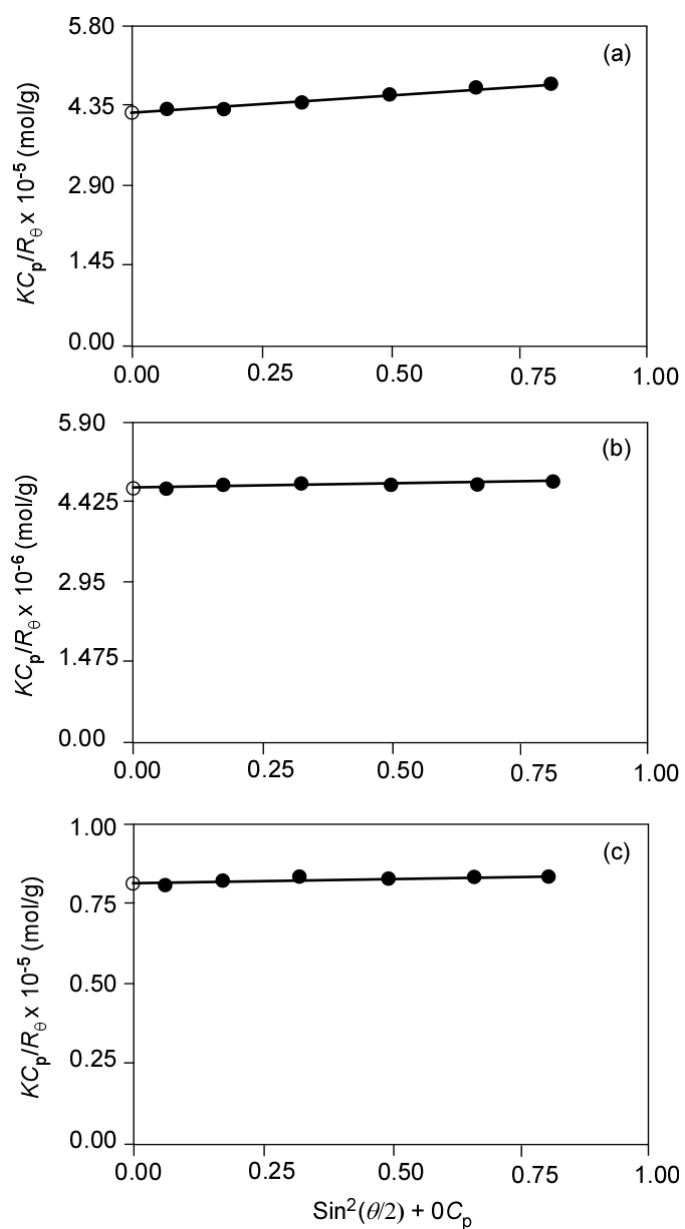

**Figure S2.** Zimm plots for (a) P(MPC/DPAEMA50)<sub>107</sub> and (b) PMPC<sub>52</sub>-*b*-PDPAEMA<sub>56</sub> at a polymer concentration ( $C_p$ ) of 2.0 g/L at pH 10 and (c) an equimolar mixture of the random and block copolymers at a  $C_p$  of 5.0 g/L at pH 10 in 0.1 M NaCl at 25°C.

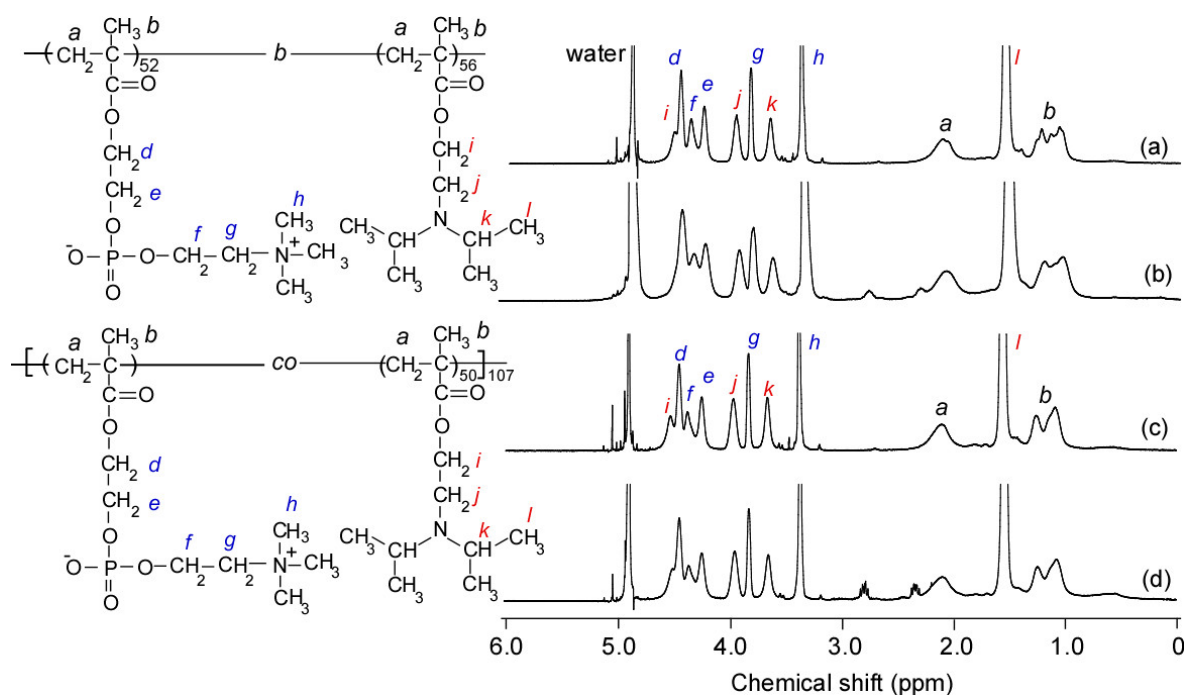

**Figure S3.**  $^1\text{H}$  NMR spectra of  $\text{PMPC}_{52}\text{-}b\text{-PDPAEMA}_{56}$  (a) before and (b) after labeling with Alexa Fluor 488  $\text{C}_5$  maleimide and  $\text{P}(\text{MPC}/\text{DPAEMA}50)_{107}$  (c) before and (d) after labeling with Alexa Fluor 555  $\text{C}_2$  maleimide in  $\text{D}_2\text{O}$  at pH 3 and  $25^\circ\text{C}$ .

**Table S1.** Characterization of  $\text{P}(\text{MPC}/\text{DPAEMA}50)_{107}$  and  $\text{PMPC}_{52}\text{-}b\text{-PDPAEMA}_{56}$  Before and After Fluorescence-labeling

|                              | $\text{P}(\text{MPC}/\text{DPAEMA}50)_{107}$ |                        | $\text{PMPC}_{52}\text{-}b\text{-PDPAEMA}_{56}$ |                        |
|------------------------------|----------------------------------------------|------------------------|-------------------------------------------------|------------------------|
|                              | Before labeling                              | After labeling by A555 | Before labeling                                 | After labeling by A488 |
| $M_n \times 10^{-4}$ (g/mol) | 1.02                                         | 1.19                   | 1.49                                            | 1.62                   |
| $M_w/M_n$                    | 1.03                                         | 1.44                   | 1.14                                            | 1.36                   |

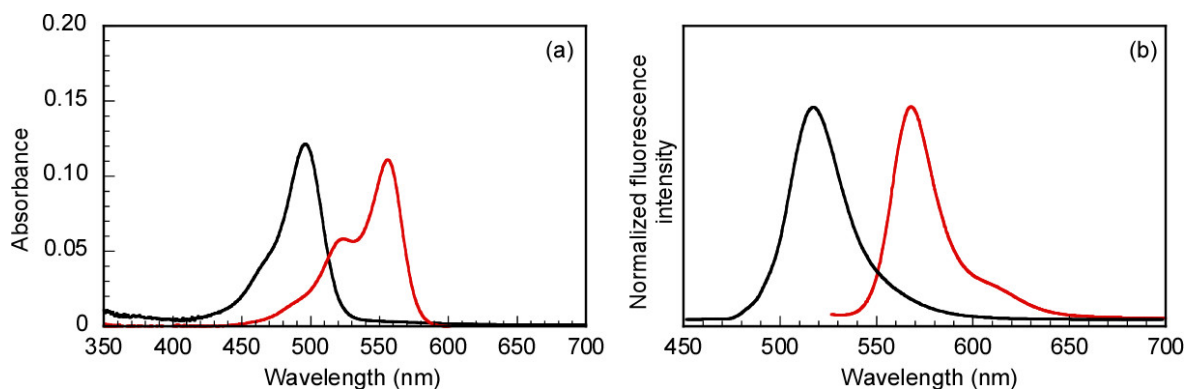

**Figure S4.** (a) UV-vis absorption and (b) fluorescence spectra of A555-labeled P(MPC/DPAEMA50)<sub>107</sub> ( $\lambda_{\text{ex}} = 520$  nm) (—) and A488-labeled PMPC<sub>52</sub>-*b*-PDPAEMA<sub>56</sub> ( $\lambda_{\text{ex}} = 493$  nm) (—) in pure water at 25°C. A488 = Alexa Fluor 488 C<sub>5</sub> maleimide; A555 = Alexa Fluor 555 C<sub>2</sub> maleimide.

**Table S2.** Fluorescence Intensities of Donor and Acceptor

| Sample                        | Fluorescence intensity |       |         |       | $E^c$  |        |
|-------------------------------|------------------------|-------|---------|-------|--------|--------|
|                               | $I_D^a$                |       | $I_A^b$ |       | pH 2   | pH 11  |
|                               | pH 2                   | pH 11 | pH 2    | pH 11 |        |        |
| Mixture of donor and acceptor | 82.6                   | 106.2 | 8.63    | 2.87  | 0.0768 | 0.0389 |
| Donor only                    | 89.5                   | 110.5 | -       | -     | -      | -      |
| Acceptor only                 | -                      | -     | 7.16    | 2.29  | -      | -      |

<sup>a</sup>Fluorescence intensity of the donor (A488 at 516 nm).  $I_D = 0$  in the solution of the acceptor only. <sup>b</sup>Fluorescence intensity of the acceptor (A555 at 565 nm).  $I_A = 0$  in the solution of the donor only. <sup>c</sup>FRET efficiency calculated using the expression  $1 - I_{DA}/I_D$ , where  $I_D$  and  $I_{DA}$  are the fluorescence intensities of the donor in the absence and presence of the acceptor at 516 nm.

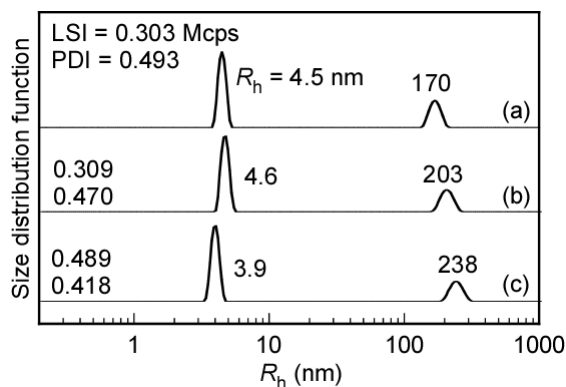

**Figure S5.** Hydrodynamic radius ( $R_h$ ) distributions of (a) P(MPC/DPAEMA50)<sub>107</sub>, (b) PMPC<sub>52</sub>-*b*-PDPAEMA<sub>56</sub>, and (c) an equimolar mixture of the random and block copolymers in acidified dimethylsulfoxide at 25°C.

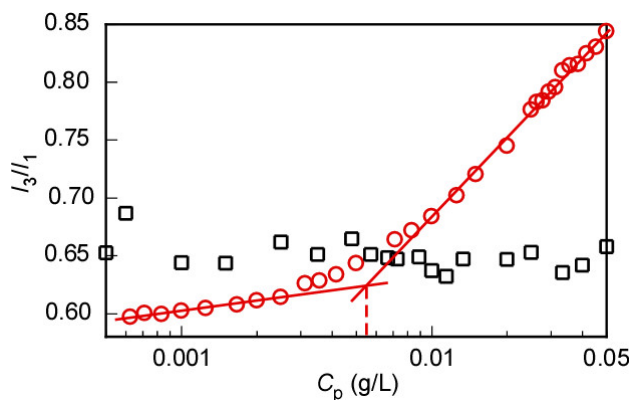

**Figure S6.** Fluorescence peak intensity ratio ( $I_3/I_1$ ) of pyrene in the presence of (MPC/DPAEMA50)<sub>107</sub> (□) and PMPC<sub>52</sub>-*b*-PDPAEMA<sub>56</sub> (○) in 0.1 M NaCl plotted against the polymer concentration ( $C_p$ ).  $I_3$  and  $I_1$  are the fluorescence intensities of the third and the first vibronic peaks, respectively, in the pyrene emission spectra recorded at the excitation wavelength of 334 nm.
